# Supplementary material for: Optimization of mass spectrometry settings for steroidomic analysis in young and old killifish
Source: PubMed Central journal article supplement (PMC7320053; doi:10.1007/s00216-020-02640-6), 2020-04-24
Supplement: 216_2020_2640_MOESM1_ESM.pdf [file 216_2020_2640_MOESM1_ESM.pdf]

**Analytical and Bioanalytical Chemistry**

**Electronic Supplementary Material**

**Optimization of mass spectrometry settings for steroidomic analysis in young and old killifish**

Rahel Dabrowski, Roberto Ripa, Christian Latza, Andrea Annibal, Adam Antebi

**Table S1** Optimization of spray voltage

| Spray voltage         | 1 kV     |         | 2 kV     |         | 3 kV     |         | 4 kV     |         | 5 kV     |         | 6 kV     |         |
|-----------------------|----------|---------|----------|---------|----------|---------|----------|---------|----------|---------|----------|---------|
|                       | mean     | RSD (%) | mean     | RSD (%) | mean     | RSD (%) | mean     | RSD (%) | mean     | RSD (%) | mean     | RSD (%) |
| Compound              |          |         |          |         |          |         |          |         |          |         |          |         |
| Squalene              | 2.02E+05 | 4.37    | 7.89E+05 | 6.91    | 1.96E+06 | 6.69    | 2.76E+06 | 7.30    | 2.94E+06 | 4.39    | 2.48E+06 | 5.77    |
| Lanosterol            | 3.42E+05 | 2.68    | 5.54E+05 | 4.43    | 7.23E+05 | 1.92    | 2.23E+06 | 8.63    | 5.73E+06 | 2.12    | 6.63E+06 | 9.04    |
| 7 Dehydrocholesterol  | 3.60E+05 | 3.41    | 9.41E+05 | 4.35    | 2.38E+06 | 10.98   | 2.83E+06 | 12.58   | 1.68E+06 | 5.65    | 1.27E+06 | 5.79    |
| 24 Hydroxycholesterol | 1.62E+04 | 5.57    | 3.02E+04 | 8.67    | 1.20E+05 | 2.44    | 1.66E+05 | 11.73   | 1.50E+05 | 2.27    | 1.74E+05 | 5.97    |
| 25 Hydroxycholesterol | 3.80E+03 | 4.29    | 3.62E+03 | 6.68    | 1.20E+04 | 4.96    | 2.20E+04 | 9.68    | 4.19E+04 | 5.32    | 5.67E+04 | 7.48    |
| 27 Hydroxycholesterol | 7.67E+03 | 1.92    | 8.61E+03 | 5.48    | 1.65E+04 | 6.06    | 2.39E+04 | 5.39    | 3.07E+04 | 11.74   | 3.78E+04 | 4.50    |
| Progesterone          | 7.28E+05 | 9.16    | 2.55E+06 | 9.44    | 3.08E+06 | 10.86   | 2.49E+06 | 13.67   | 1.08E+06 | 10.68   | 7.25E+05 | 5.66    |
| Corticosterone        | 5.83E+05 | 5.33    | 1.75E+06 | 7.86    | 4.54E+06 | 8.77    | 5.85E+06 | 4.21    | 5.55E+06 | 1.06    | 4.38E+06 | 3.32    |
| Testosterone          | 1.41E+06 | 10.77   | 4.01E+06 | 5.75    | 9.78E+06 | 3.56    | 1.56E+07 | 8.52    | 1.20E+07 | 4.10    | 9.18E+06 | 10.69   |

**Table S2** Optimization of resolution

| Resolution            | 17,500   |         | 30,000   |         | 70,000   |         | 140,000  |         | 280,000  |         |
|-----------------------|----------|---------|----------|---------|----------|---------|----------|---------|----------|---------|
|                       | mean     | RSD (%) | mean     | RSD (%) | mean     | RSD (%) | mean     | RSD (%) | mean     | RSD (%) |
| Compound              |          |         |          |         |          |         |          |         |          |         |
| Squalene              | 2.15E+06 | 8.77    | 2.82E+06 | 3.25    | 2.76E+06 | 7.30    | 2.31E+06 | 1.39    | 2.04E+06 | 9.80    |
| Lanosterol            | 2.30E+06 | 6.63    | 1.69E+06 | 9.49    | 2.23E+06 | 8.63    | 1.58E+06 | 12.80   | 1.63E+06 | 5.08    |
| 7 Dehydrocholesterol  | 0.00E+00 | 0.00    | 0.00E+00 | 7.74    | 2.83E+06 | 12.58   | 0.00E+00 | 0.00    | 0.00E+00 | 0.00    |
| 24 Hydroxycholesterol | 1.68E+05 | 7.21    | 2.19E+05 | 5.88    | 1.66E+05 | 11.73   | 2.20E+05 | 11.10   | 1.58E+05 | 7.72    |
| 25 Hydroxycholesterol | 4.10E+04 | 15.63   | 2.76E+04 | 7.99    | 2.20E+04 | 9.68    | 2.07E+04 | 9.81    | 1.35E+04 | 9.01    |
| 27 Hydroxycholesterol | 4.84E+04 | 8.34    | 3.02E+04 | 5.84    | 2.39E+04 | 5.39    | 2.20E+04 | 1.75    | 1.72E+04 | 7.14    |
| Progesterone          | 4.75E+06 | 6.25    | 4.41E+06 | 10.97   | 2.49E+06 | 13.67   | 3.20E+06 | 9.62    | 2.49E+06 | 0.28    |
| Corticosterone        | 5.97E+06 | 5.20    | 3.10E+06 | 3.88    | 5.85E+06 | 4.21    | 6.20E+06 | 1.74    | 4.86E+06 | 5.10    |
| Testosterone          | 1.09E+07 | 1.06    | 1.15E+07 | 1.82    | 1.56E+07 | 8.52    | 1.51E+07 | 7.37    | 1.21E+07 | 2.34    |

**Table S3-1** AGC Parameter optimization

| AGC target            | 2e4      |         | 5e4      |         | 1e5      |         | 2e5      |         | 5e5      |         |
|-----------------------|----------|---------|----------|---------|----------|---------|----------|---------|----------|---------|
|                       | mean     | RSD (%) | mean     | RSD (%) | mean     | RSD (%) | mean     | RSD (%) | mean     | RSD (%) |
| Squalene              | 4.08E+06 | 8.68    | 5.44E+06 | 3.79    | 8.85E+06 | 13.17   | 5.44E+06 | 6.99    | 1.94E+06 | 8.73    |
| Lanosterol            | 1.02E+07 | 8.27    | 4.95E+06 | 14.27   | 7.13E+06 | 4.77    | 2.48E+06 | 3.14    | 9.39E+05 | 11.23   |
| 7 Dehydrocholesterol  | 3.29E+06 | 8.78    | 3.59E+06 | 13.36   | 4.96E+06 | 5.42    | 4.82E+06 | 4.07    | 2.24E+06 | 4.15    |
| 24 Hydroxycholesterol | 0.00E+00 | 0.00    | 0.00E+00 | 0.00    | 0.00E+00 | 0.00    | 6.18E+05 | 6.10    | 5.09E+04 | 9.63    |
| 25 Hydroxycholesterol | 0.00E+00 | 0.00    | 0.00E+00 | 0.00    | 0.00E+00 | 0.00    | 0.00E+00 | 0.00    | 0.00E+00 | 0.00    |
| 27 Hydroxycholesterol | 0.00E+00 | 0.00    | 0.00E+00 | 0.00    | 0.00E+00 | 0.00    | 0.00E+00 | 0.00    | 0.00E+00 | 0.00    |
| Progesterone          | 2.27E+07 | 9.00    | 2.57E+07 | 10.70   | 2.40E+07 | 12.69   | 1.81E+07 | 14.41   | 1.30E+07 | 6.11    |
| Corticosterone        | 1.13E+07 | 5.33    | 1.22E+07 | 7.42    | 1.12E+07 | 0.51    | 1.08E+07 | 2.99    | 8.37E+06 | 7.91    |
| Testosterone          | 2.38E+07 | 2.57    | 2.36E+07 | 4.66    | 3.23E+07 | 6.83    | 2.92E+07 | 2.25    | 1.54E+07 | 3.25    |

**Table S3-2** AGC Parameter optimization

| AGC target            | 1e6      |         | 3e6      |         | 5e6      |         |
|-----------------------|----------|---------|----------|---------|----------|---------|
|                       | mean     | RSD (%) | mean     | RSD (%) | mean     | RSD (%) |
| Squalene              | 1.27E+06 | 6.76    | 2.76E+06 | 7.30    | 7.65E+05 | 8.49    |
| Lanosterol            | 7.40E+05 | 9.51    | 2.23E+06 | 8.63    | 6.15E+05 | 3.73    |
| 7 Dehydrocholesterol  | 1.76E+06 | 12.38   | 2.83E+06 | 12.58   | 1.25E+06 | 3.96    |
| 24 Hydroxycholesterol | 3.41E+04 | 6.80    | 1.66E+05 | 11.73   | 2.16E+04 | 10.03   |
| 25 Hydroxycholesterol | 0.00E+00 | 0.00    | 2.20E+04 | 9.68    | 8.39E+03 | 9.16    |
| 27 Hydroxycholesterol | 0.00E+00 | 0.00    | 2.39E+04 | 5.39    | 9.18E+03 | 7.77    |
| Progesterone          | 8.91E+06 | 3.66    | 2.49E+06 | 13.67   | 5.24E+06 | 12.82   |
| Corticosterone        | 6.76E+06 | 1.66    | 5.85E+06 | 4.21    | 4.15E+06 | 3.98    |
| Testosterone          | 1.20E+07 | 0.48    | 1.56E+07 | 8.52    | 6.52E+06 | 3.17    |

**Table S4** Injection time optimization

| Injection time        | 100 ms   |         | 150 ms   |         | 200 ms   |         | 250 ms   |         |
|-----------------------|----------|---------|----------|---------|----------|---------|----------|---------|
|                       | mean     | RSD (%) | mean     | RSD (%) | mean     | RSD (%) | mean     | RSD (%) |
| Compound              |          |         |          |         |          |         |          |         |
| Squalene              | 1.16E+06 | 0.00    | 3.05E+05 | 7.46    | 8.46E+06 | 5.61    | 1.19E+06 | 7.54    |
| Lanosterol            | 1.08E+06 | 4.12    | 9.88E+05 | 4.88    | 7.13E+06 | 2.34    | 9.93E+05 | 8.39    |
| 7 Dehydrocholesterol  | 1.45E+05 | 10.48   | 1.20E+05 | 2.70    | 4.96E+06 | 7.57    | 1.20E+05 | 6.08    |
| 24 Hydroxycholesterol | 7.90E+03 | 7.53    | 1.21E+04 | 9.06    | 1.66E+05 | 5.10    | 8.10E+03 | 8.07    |
| 25 Hydroxycholesterol | 6.31E+03 | 7.38    | 7.90E+03 | 10.02   | 2.20E+04 | 1.38    | 6.23E+03 | 8.55    |
| 27 Hydroxycholesterol | 2.14E+04 | 9.81    | 2.08E+04 | 9.21    | 2.39E+04 | 2.33    | 2.08E+04 | 1.73    |
| Progesterone          | 1.18E+05 | 8.20    | 1.17E+05 | 4.41    | 2.40E+07 | 1.44    | 0.00E+00 | 8.21    |
| Corticosterone        | 4.88E+05 | 4.58    | 5.45E+05 | 5.77    | 1.12E+07 | 2.50    | 4.75E+05 | 11.29   |
| Testosterone          | 2.87E+05 | 9.82    | 3.19E+05 | 2.40    | 3.23E+07 | 6.32    | 2.85E+05 | 7.01    |

**Table S5** Flowrate optimization

| Flowrate              | 50 ul/min |         | 100 ul/min |         | 150 ul/min |         | 200 ul/min |         |
|-----------------------|-----------|---------|------------|---------|------------|---------|------------|---------|
|                       | mean      | RSD (%) | mean       | RSD (%) | mean       | RSD (%) | mean       | RSD (%) |
| Compound              |           |         |            |         |            |         |            |         |
| Squalene              | 0.00E+00  | 0.00    | 5.21E+06   | 2.39    | 4.31E+05   | 8.94    | 1.06E+05   | 3.21    |
| Lanosterol            | 5.70E+05  | 3.21    | 7.13E+06   | 3.64    | 6.76E+05   | 4.13    | 0.00E+00   | 0.00    |
| 7 Dehydrocholesterol  | 0.00E+00  | 0.00    | 4.96E+06   | 4.52    | 1.05E+08   | 2.42    | 1.77E+07   | 13.75   |
| 24 Hydroxycholesterol | 7.40E+04  | 6.61    | 1.15E+04   | 2.80    | 5.57E+04   | 1.18    | 1.01E+04   | 11.30   |
| 25 Hydroxycholesterol | 1.22E+05  | 5.02    | 1.22E+04   | 9.23    | 6.04E+03   | 7.01    | 1.26E+04   | 12.34   |
| 27 Hydroxycholesterol | 2.06E+05  | 7.99    | 2.21E+04   | 7.37    | 3.48E+04   | 9.72    | 3.11E+04   | 8.30    |
| Progesterone          | 0.00E+00  | 0.00    | 2.40E+07   | 4.50    | 2.65E+07   | 8.33    | 2.56E+07   | 13.02   |
| Corticosterone        | 0.00E+00  | 0.00    | 1.12E+04   | 8.32    | 9.93E+06   | 4.82    | 7.95E+05   | 10.52   |
| Testosterone          | 0.00E+00  | 0.00    | 3.23E+07   | 1.23    | 2.07E+07   | 4.56    | 1.55E+07   | 4.16    |

**Table S6** Needle position optimization

| Needle position<br>Compound | A        |         | B        |         | C        |         | D        |         |
|-----------------------------|----------|---------|----------|---------|----------|---------|----------|---------|
|                             | mean     | RSD (%) | mean     | RSD (%) | mean     | RSD (%) | mean     | RSD (%) |
| Squalene                    | 3.58E+06 | 7.66    | 5.48E+06 | 2.37    | 4.31E+05 | 4.29    | 1.72E+06 | 9.71    |
| Lanosterol                  | 3.02E+06 | 1.02    | 2.47E+06 | 4.58    | 6.76E+05 | 7.37    | 5.11E+06 | 8.66    |
| 7 Dehydrocholesterol        | 5.52E+07 | 12.09   | 4.89E+07 | 8.66    | 1.05E+08 | 4.14    | 1.41E+08 | 11.26   |
| 24 Hydroxycholesterol       | 3.13E+04 | 9.79    | 6.91E+04 | 4.50    | 5.57E+04 | 7.58    | 1.14E+04 | 13.25   |
| 25 Hydroxycholesterol       | 1.20E+04 | 4.98    | 1.09E+04 | 7.32    | 6.04E+03 | 13.70   | 1.65E+04 | 8.18    |
| 27 Hydroxycholesterol       | 2.49E+04 | 10.90   | 3.09E+04 | 8.11    | 3.48E+04 | 13.89   | 5.27E+04 | 5.42    |
| Progesterone                | 7.00E+06 | 3.16    | 1.50E+07 | 9.23    | 2.65E+07 | 8.67    | 4.39E+07 | 4.55    |
| Corticosterone              | 1.45E+07 | 11.67   | 1.09E+07 | 2.42    | 9.93E+06 | 6.91    | 1.73E+07 | 3.62    |
| Testosterone                | 3.01E+07 | 2.09    | 2.10E+07 | 7.51    | 2.07E+07 | 6.64    | 2.77E+07 | 3.28    |

**Table S7** Extraction method optimization

| Methods<br>Compound   | Bligh and Dyer |         | MeOH     |         | SPE      |         |
|-----------------------|----------------|---------|----------|---------|----------|---------|
|                       | mean           | RSD (%) | mean     | RSD (%) | mean     | RSD (%) |
| Squalene              | 9.29E+05       | 4.20    | 2.22E+06 | 4.68    | 1.45E+06 | 2.36    |
| Lanosterol            | 2.66E+06       | 1.12    | 2.66E+05 | 7.95    | 4.10E+05 | 10.30   |
| 7 Dehydrocholesterol  | 9.84E+04       | 2.35    | 1.68E+04 | 5.48    | 2.69E+05 | 7.36    |
| 24 Hydroxycholesterol | 9.30E+03       | 4.65    | 1.68E+04 | 9.85    | 3.22E+04 | 8.35    |
| 25 Hydroxycholesterol | 1.87E+04       | 7.63    | 6.39E+03 | 5.95    | 3.22E+04 | 2.56    |
| 27 Hydroxycholesterol | 1.38E+04       | 8.87    | 1.87E+04 | 6.34    | 3.22E+04 | 6.35    |
| Progesterone          | 4.27E+04       | 4.36    | 5.49E+04 | 2.35    | 8.02E+04 | 9.23    |
| Corticosterone        | 4.30E+05       | 4.28    | 5.74E+05 | 1.93    | 2.35E+05 | 7.33    |
| Testosterone          | 2.68E+05       | 1.35    | 2.02E+05 | 1.80    | 6.54E+06 | 4.89    |

**Table S8** Accuracy and estimated concentration of steroids in killifish tissues

| Compound              | elemental composition                          | $\Delta$ ppm | Estimated concentration in tissues young/old (pg/mL) |            |            |           |
|-----------------------|------------------------------------------------|--------------|------------------------------------------------------|------------|------------|-----------|
|                       |                                                |              | gut                                                  | liver      | brain      | gonad     |
| Squalene              | C <sub>30</sub> H <sub>50</sub>                | -1.407       | ≈0.36-0.33                                           | ≈0.35-0.17 | ≈0.34-0.15 | ≈0.9-0.45 |
| Lanosterol            | C <sub>30</sub> H <sub>50</sub> O              | -2.322       | ≈21-22                                               | ≈21-12     | ≈6.3-1.6   | ≈56-32    |
| 7 Dehydrocholesterol  | C <sub>27</sub> H <sub>44</sub> O              | -0.781       | ≈20-21                                               | ≈12-6      | ≈25-23     | ≈42-49    |
| 24 Hydroxycholesterol | C <sub>27</sub> H <sub>46</sub> O <sub>2</sub> | -3.938       | ≈10-9                                                | ≈12-10     | ≈10-5      | ≈10-13    |
| 25 Hydroxycholesterol | C <sub>27</sub> H <sub>46</sub> O <sub>2</sub> | -2.198       | ≈4-5                                                 | ≈5-10      | ≈10-20     | ≈5-37     |
| 27 Hydroxycholesterol | C <sub>27</sub> H <sub>46</sub> O <sub>2</sub> | -2.274       | ≈2-4                                                 | ≈0.2-2     | ≈2-10      | ≈10-41    |
| Progesterone          | C <sub>21</sub> H <sub>30</sub> O <sub>2</sub> | 1.634        | ≈172-50                                              | ≈44-40     | ≈50-23     | ≈181-40   |
| Corticosterone        | C <sub>21</sub> H <sub>30</sub> O <sub>4</sub> | 2.648        | ≈39-44                                               | ≈20-25     | ≈20-25     | ≈81-62    |
| Testosterone          | C <sub>19</sub> H <sub>28</sub> O <sub>2</sub> | -2.919       | ≈670-698                                             | ≈374-113   | ≈117-112   | ≈3240-328 |

**Table S9** LC-Gradient

| Time (min) | Eluent %B |
|------------|-----------|
| 0.3        | 10        |
| 8          | 99        |
| 10         | 99        |
| 11         | 10        |
| 12         | 10        |

Figure S1  
Gut Tissue

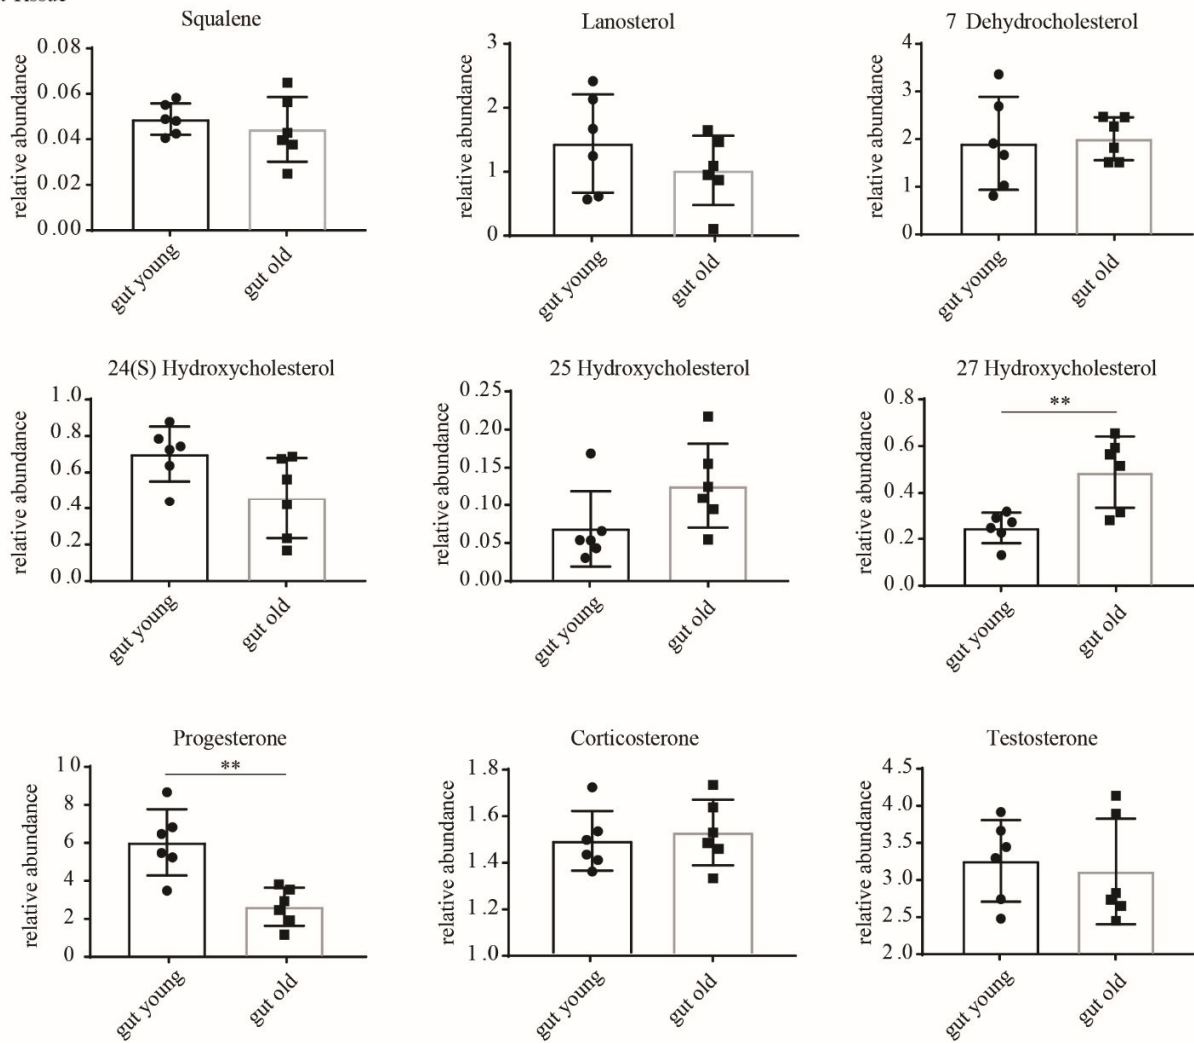

**Fig. S1** Quantification of steroid in gut tissue of young and old killifish. Statistical test were performed using t-test. \*  $P \leq 0.05$ , \*\*  $P \leq 0.01$ , \*\*\*  $P \leq 0.001$

Figure S2  
Liver Tissue

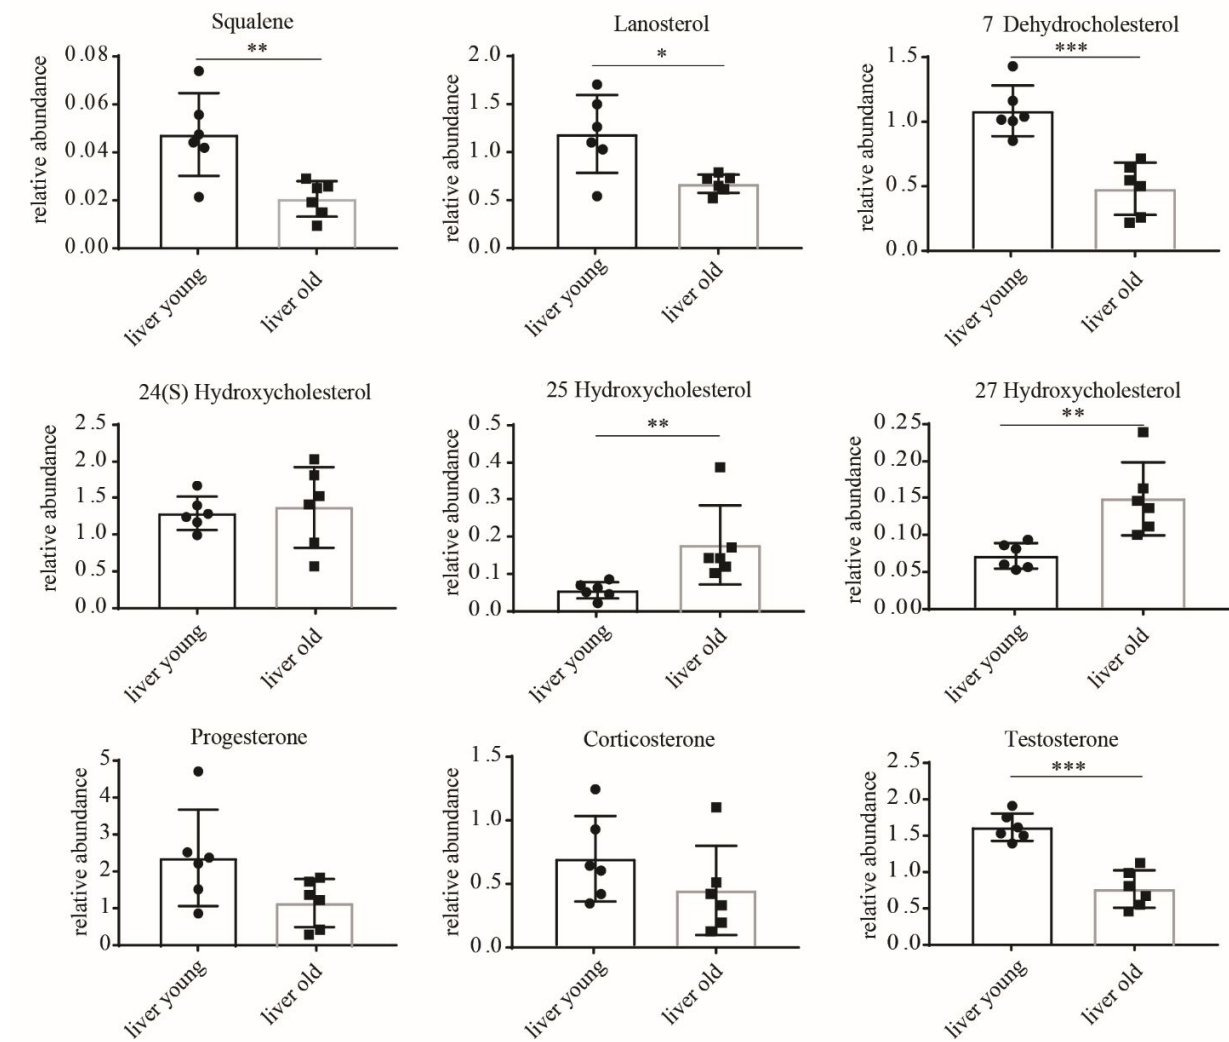

**Fig. S2** Quantification of steroid in liver tissue of young and old killifish. Statistical test were performed using t-test. \*  $P \leq 0.05$ , \*\*  $P \leq 0.01$ , \*\*\*  $P \leq 0.001$



Figure S3  
Brain Tissue

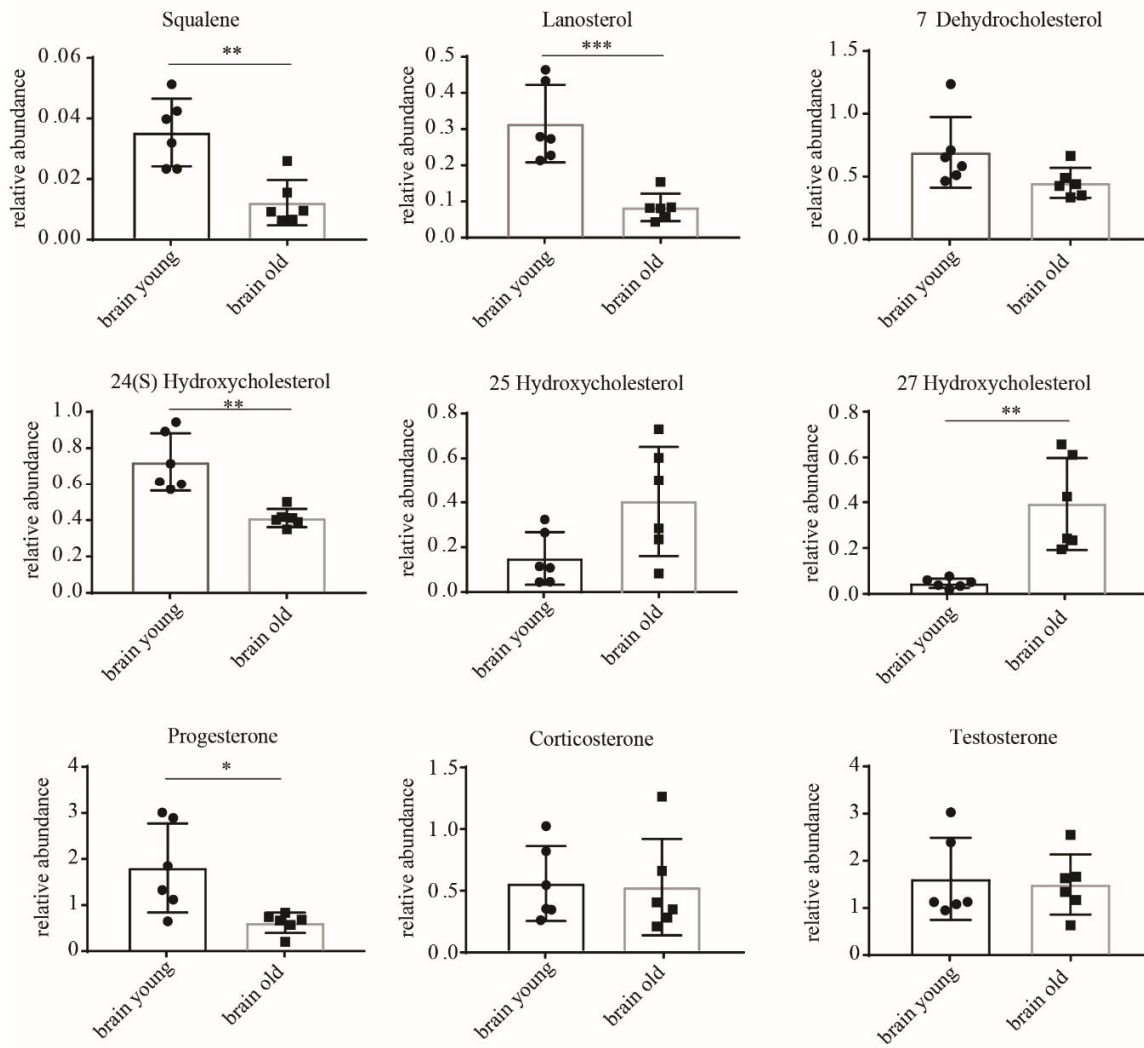

**Fig. S3** Quantification of steroid in brain tissue of young and old killfish. Statistical test were performed using t-test. \*  $P \leq 0.05$ , \*\*  $P \leq 0.01$ , \*\*\*  $P \leq 0.001$

Figure S4  
Gonad Tissue

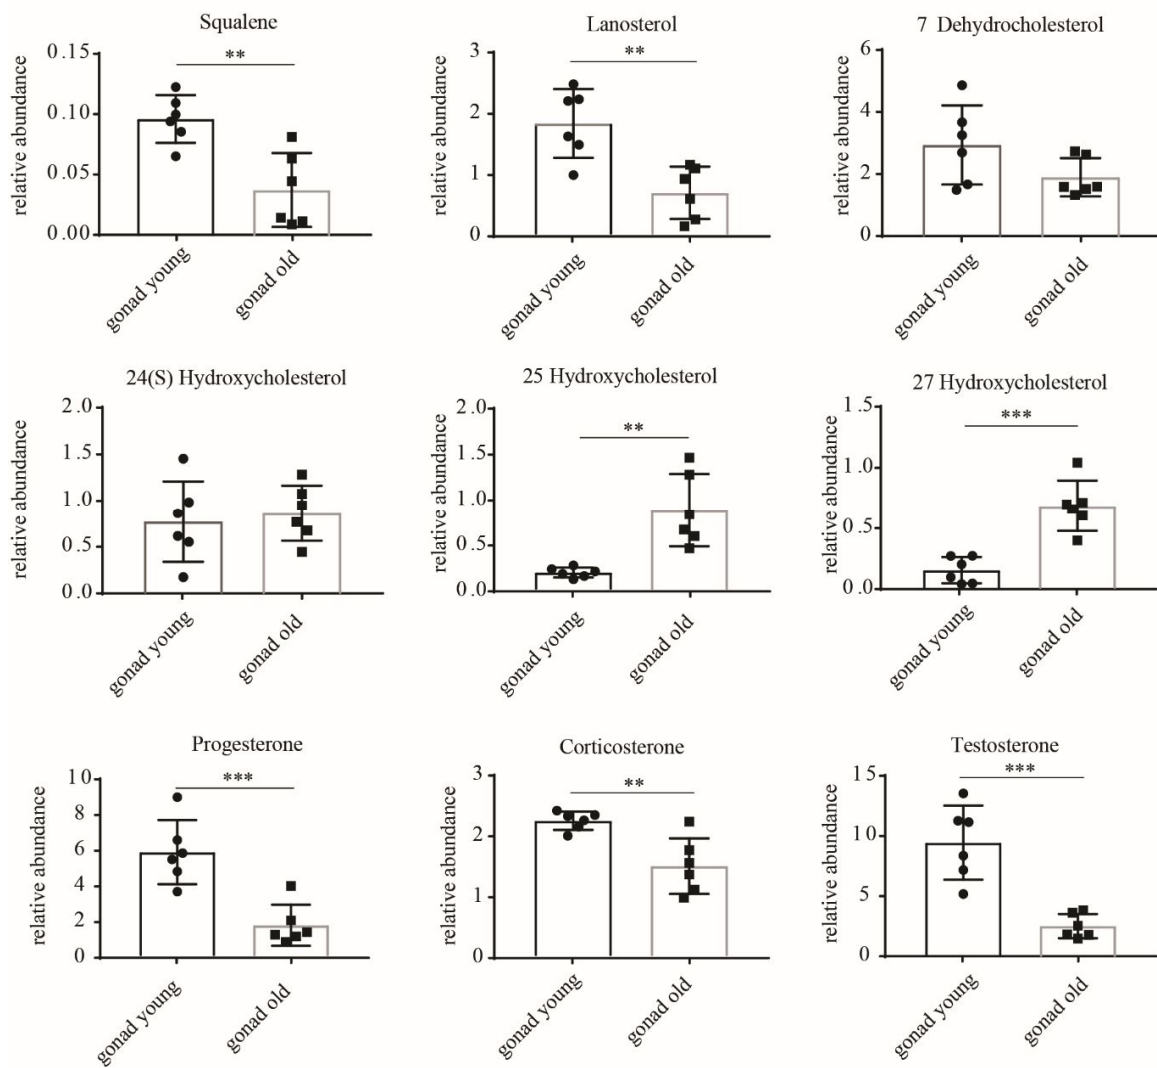

**Fig. S4** Quantification of steroid in gonad tissue of young and old killifish. Statistical test were performed using t-test. \*  $P \leq 0.05$ , \*\*  $P \leq 0.01$ , \*\*\*  $P \leq 0.001$

**Table S10** Comparison with existing LC-MS based method

| Compound                | LOQ              | Ionisation/Setup | References |
|-------------------------|------------------|------------------|------------|
| Cortisol                | 2.5nmol/L        | HPLC-ESI-MS/MS   | (1)        |
| 17OH pregnelone         | 43 pg/mL         | HPLC-ESI-MS/MS   | (2)        |
| Testosterone            | 22 pg/mL         | HPLC-ESI-MS/MS   | (2)        |
| Pregnelone              | 250 pg/mL        | HPLC-ESI-MS/MS   | (3)        |
| Testosterone            | 72 pg/mL         | HPLC-ESI-MS/MS   | (4)        |
| Testosterone            | 20 pg/mL         | HPLC-ESI-MS/MS   | (5)        |
| Testosterone            | 20 pg/mL         | HPLC-ESI-MS/MS   | (6)        |
| Testosterone            | 20 pg/mL         | HPLC-ESI-MS/MS   | (7)        |
| Testosterone            | 50 pg/mL         | HPLC-ESI-MS/MS   | (8)        |
| Lanosterol              | 50 ng/mL         | APCI             | (9)        |
| Squalene                | 50 µg/mL         | GC-MS            | (10)       |
| Lanosterol              | 20 µg/mL         | HPLC-ESI-MS/MS   | (10)       |
| 7 Dehydrocholesterol    | 200 µg/mL        | HPLC-ESI-MS/MS   | (10)       |
| 7- $\alpha/\beta$ -OHC, | 0.5 ng/ml        | HPLC-ESI-MS/MS   | (10)       |
| 25-hydroxycholesterol   | 4.0 ng/mL        | HPLC-ESI-MS/MS   | (11)       |
| 27-hydroxycholesterol   | 5 ng/mL          | HPLC-ESI-MS/MS   | (11)       |
| 27-hydroxycholesterol   | 4 ng/mL          | HPLC-ESI-MS/MS   | (11)       |
| 7-dehydrocholesterol    | 26.0 ng/mL       | HPLC-ESI-MS/MS   | (11)       |
| Several sterols         | 0.01 to 20 ng/mL | HPLC-ESI-MS/MS   | (12)       |

## References

1. Wear JE, Owen LJ, Duxbury K, Keevil BG. A simplified method for the measurement of urinary free cortisol using LC-MS/MS. *J Chromatogr B Analyt Technol Biomed Life Sci.* 2007;858(1-2):27-31. Epub 2007/08/19.
2. Keski-Rahkonen P, Huhtinen K, Poutanen M, Auriola S. Fast and sensitive liquid chromatography-mass spectrometry assay for seven androgenic and progestagenic steroids in human serum. *J Steroid Biochem Mol Biol.* 2011;127(3-5):396-404. Epub 2011/06/21.
3. Kushnir MM, Rockwood AL, Roberts WL, Pattison EG, Owen WE, Bunker AM, Meikle AW. Development and performance evaluation of a tandem mass spectrometry assay for 4 adrenal steroids. *Clin Chem.* 2006;52(8):1559-67. Epub 2006/06/17.
4. Haring R, Hannemann A, John U, Radke D, Nauck M, Wallaschofski H, Owen L, Adaway J, Keevil BG, Brabant G. Age-specific reference ranges for serum testosterone and androstenedione concentrations in women measured by liquid chromatography-tandem mass spectrometry. *J Clin Endocrinol Metab.* 2012;97(2):408-15. Epub 2011/12/14.
5. McNamara KM, Harwood DT, Simanainen U, Walters KA, Jimenez M, Handelsman DJ. Measurement of sex steroids in murine blood and reproductive tissues by liquid chromatography-tandem mass spectrometry. *J Steroid Biochem Mol Biol.* 2010;121(3-5):611-8. Epub 2010/02/11.
6. Rothman MS, Carlson NE, Xu M, Wang C, Swerdloff R, Lee P, Goh VH, Ridgway EC, Wierman ME. Reexamination of testosterone, dihydrotestosterone, estradiol and estrone levels across the menstrual cycle and in postmenopausal women measured by liquid chromatography-tandem mass spectrometry. *Steroids.* 2011;76(1-2):177-82. Epub 2010/11/13.
7. Fanelli F, Belluomo I, Di Lallo VD, Cuomo G, De Iasio R, Baccini M, Casadio E, Casetta B, Vicennati V, Gambineri A, Grossi G, Pasquali R, Pagotto U. Serum steroid profiling by isotopic dilution-liquid chromatography-mass spectrometry: comparison with current immunoassays and reference intervals in healthy adults. *Steroids.* 2011;76(3):244-53. Epub 2010/11/30.
8. Saeves I, Vethe NT, Bergan S. Quantification of 6 glucocorticoids in human plasma by liquid chromatography tandem mass spectrometry: method development, validation, and assessment of matrix effects. *Ther Drug Monit.* 2011;33(4):402-10. Epub 2011/07/12.
9. Trosken ER, Straube E, Lutz WK, Volkel W, Patten C. Quantitation of lanosterol and its major metabolite FF-MAS in an inhibition assay of CYP51 by azoles with atmospheric pressure photoionization based LC-MS/MS. *J Am Soc Mass Spectrom.* 2004;15(8):1216-21. Epub 2004/07/28.
10. Muller C, Junker J, Bracher F, Giera M. A gas chromatography-mass spectrometry-based whole-cell screening assay for target identification in distal cholesterol biosynthesis. *Nat Protoc.* 2019;14(8):2546-70. Epub 2019/07/26.
11. Narayanaswamy R, Iyer V, Khare P, Bodziak ML, Badgett D, Zivadinov R, Weinstock-Guttman B, Rideout TC, Ramanathan M, Browne RW. Simultaneous determination of oxysterols, cholesterol and 25-hydroxy-vitamin D3 in human plasma by LC-UV-MS. *PLoS One.* 2015;10(4):e0123771. Epub 2015/04/16.
12. du Toit T, Stander MA, Swart AC. A high-throughput UPC(2)-MS/MS method for the separation and quantification of C19 and C21 steroids and their C11-oxy steroid metabolites in the classical, alternative, backdoor and 11OHA4 steroid pathways. *J Chromatogr B Analyt Technol Biomed Life Sci.* 2018;1080:71-81. Epub 2018/02/27.
